# Supplementary material for: Metal-metalloporphyrin MOF-derived core–shell Ni 3 Fe@FeNi-NC towards high-performance bifunctional oxygen electrocatalysis
Source: Royal Society of Chemistry journal article supplement (doi:10.1039/d5cc06281k), 2025-12-09
Supplement: d5cc06281k1.pdf [file d5cc06281k1.pdf]

## Electronic Supplementary Information

### **Metal-metalloporphyrin MOF-derived core-shell Ni<sub>3</sub>Fe@FeNi-NC towards high-performance bifunctional oxygen electrocatalysis**

Kairen Cheng,<sup>a</sup> Guoxin Zhang,<sup>a</sup> Xingxing Li,<sup>a</sup> Jiangxia Tian,<sup>a</sup> Min Zhao,<sup>b</sup> Kai Chen,<sup>\*a</sup> Aili Liu,<sup>\*a</sup>  
Shun Wang<sup>a</sup> and Huile Jin<sup>\*a</sup>

<sup>a</sup> Wenzhou Key Lab of Advanced Energy Storage and Conversion, College of Chemistry and Materials Engineering, Wenzhou University, Wenzhou, Zhejiang 325035, China.

<sup>b</sup> Jinhua Advanced Research Institute, Jinhua, Zhejiang, 321017, China.

Corresponding authors: Kai Chen, kaichen@wzu.edu.cn;

Aili Liu, ailikeji@126.com;

Huile Jin, huilejin@wzu.edu.cn.

## Experimental Section

### 1. Chemicals and Materials

Pyrrole and methyl *p*-formylbenzoate were purchased from Shanghai Bide Pharmatech Co., Ltd. Ferrous chloride tetrahydrate ( $\text{FeCl}_2 \cdot 4\text{H}_2\text{O}$ ), Ferric chloride hexahydrate ( $\text{FeCl}_3 \cdot 6\text{H}_2\text{O}$ ), nickel chloride hexahydrate ( $\text{NiCl}_2 \cdot 6\text{H}_2\text{O}$ ), 2,5-dihydroxyterephthalic acid, tetrahydrofuran (THF), concentrated hydrochloric acid (HCl), concentrated sulfuric acid ( $\text{H}_2\text{SO}_4$ ), sodium hydroxide (NaOH), potassium hydroxide (KOH), zinc acetate dihydrate ( $\text{Zn}(\text{OAc})_2 \cdot 2\text{H}_2\text{O}$ ), nickel nitrate hexahydrate ( $\text{Ni}(\text{NO}_3)_2 \cdot 6\text{H}_2\text{O}$ ), pyrazine, ethanol (EtOH), *N,N*-dimethylformamide (DMF), methanol (MeOH), were purchased from Sinopharm Group Co., Ltd. Pt/C (20 wt%),  $\text{RuO}_2$ , Nafion solution and carbon black were purchased from Suzhou Sinero Tech Co., Ltd. Zinc foil, composite electrode (made of hydrophobic carbon paper and electronic conductor), customized ZAB device (OMS-TR1) were purchased from Changsha Spring New Energy Technology Co., Ltd. All chemicals and materials were used as received without further purification.

### 2. Preparation of MOF precursors.

[5,10,15,20]-Tetrakis(4-carboxyphenyl)porphine-Fe(III) chloride (FeTCPP) was synthesized according to the reference.<sup>[1]</sup> Bulk Ni-FeTCPP was prepared based on the previous report without modification.<sup>[2]</sup> Briefly,  $\text{Ni}(\text{NO}_3)_2 \cdot 6\text{H}_2\text{O}$  (5.8 mg), FeTCPP (8.8 mg), pyrazine (1.6 mg), DMF (1.5 mL), and ethanol (0.5 mL) were added into a small capped vial, and heated at 80 °C for 24 h. The resulting dark purple Ni-FeTCPP solids were harvested by centrifugation, washed thoroughly with ethanol, and dried at 80 °C overnight.

The synthesis of Zn-Fe/NiTCPP, Zn-FeTCPP, and Zn-NiTCPP was similar to Ni-FeTCPP by replacing the FeTCPP with FeTCPP (4.4 mg) and NiTCPP (4.4 mg), FeTCPP (8.8 mg), and NiTCPP (8.8 mg), respectively.

NiFe-MOF was synthesized according to the reference.<sup>[3]</sup> Concretely,  $\text{NiCl}_2 \cdot 6\text{H}_2\text{O}$  (1,114 mg, 4.69 mmol),  $\text{FeCl}_3 \cdot 6\text{H}_2\text{O}$  (421 mg, 1.56 mmol), and 2,5-dihydroxyterephthalic acid (416 mg, 2.1 mmol) were added to in 150 mL DMF-ethanol- $\text{H}_2\text{O}$  (1:1:1) mixed solution and sonicated till complete dissolution. The mixture was transferred to a Teflon-lined stainless-steel autoclave and heated in oven at 120 °C for 24 h. After cooling down to room temperature, the solid was harvested

by filtration and washed thoroughly with DMF and ethanol. Finally, the solid residue was further dried at 80 °C overnight to afford NiFe-MOF.

### 3. Preparation of MOF-derived carbon materials

The obtained Ni-FeTCPP was pyrolyzed at 900 °C in a nitrogen atmosphere for 2 h at a ramping rate of 5 °C min<sup>-1</sup> to afford Ni<sub>3</sub>Fe@FeNi-NC.

The synthesized Zn-Fe/NiTCPP, Zn-FeTCPP, and Zn-NiTCPP were first pyrolyzed at 900 °C and then etched by 0.5 M H<sub>2</sub>SO<sub>4</sub> solution at 80 °C for 24 h. The black powder was filtered and washed thoroughly with deionized water till neutral to afford FeNi-NC, Fe-NC, and Ni-NC, respectively.

Ni<sub>3</sub>Fe@C was prepared by direct pyrolysis of NiFe-MOF at 900 °C.

Ni<sub>3</sub>Fe + FeNi-NC was synthesized by integrating the Ni<sub>3</sub>Fe@C and FeNi-NC components [4]. 100 mg Ni<sub>3</sub>Fe@C and 100 mg FeNi-NC were added and dispersed into 50 mL ethanol to form a homogeneous suspension under continuous stirring at room temperature for 24 h. The hybrid product was separated by filtration and washed with deionized water and ethanol for three times, respectively. Finally, Ni<sub>3</sub>Fe + FeNi-NC was obtained after drying at 60 °C overnight.

### 4. Characterization

Scanning electron microscopy (SEM) images were performed on a NoVa 200 NanoLab (FEI). High-resolution transmission electron microscopy (HR-TEM) images were collected on JEM-2100F (JEOL). Powder X-ray diffraction (PXRD) patterns were recorded on a D8 Advance (Bruker) with filtered Cu K $\alpha$  radiation ( $\lambda$  = 1.5406 Å, operating at 40 kV and 40 mA). The nitrogen adsorption-desorption measurements were performed on a BELSORP mini II (BEL Inc.). The specific surface area was calculated using the Brunauer-Emmett-Teller (BET) model in the relative pressure range between 0-0.5. X-ray photoelectron spectra (XPS) were collected on a K-Alpha (Thermo Scientific), performing at 15 kV and 15 mA with a monochromatic Al K $\alpha$  source ( $h\nu$  = 1486.71 eV). Raman spectra were recorded on a Renishaw inVia Raman spectrometer with excitation from the 532 nm line of an Ar-ion laser.

### 5. Electrochemical measurements

All electrochemical measurements were performed using a CHI-760E electrochemical workstation (Shanghai Chenhua Instrument Co., China) in a three-electrode cell. A catalyst-loaded rotating disk electrode (RDE) (PINE) or rotating ring-disk electrode (RRDE) (PINE) was used as a working electrode, an Ag/AgCl (saturated KCl) electrode, and a graphite rod was utilized as reference and counter electrode, respectively. All the potentials were calibrated to the reversible hydrogen electrode (RHE) according to the Nernst equation:

$$E_{\text{RHE}} = E_{\text{Ag/AgCl}} + 0.0592 \times \text{pH} + E_{\text{Ag/AgCl}}^{\ominus}$$

The catalyst ink was prepared by dispersing 6.0 mg of the as-synthesized catalyst and 4.0 mg of carbon black in a mixed solution containing 980  $\mu\text{L}$  of ethanol and 20  $\mu\text{L}$  of 5 wt% Nafion solution, followed by ultrasonication until a homogeneous dispersion was observed. A specific volume of the catalyst ink was then pipetted onto the working electrode to obtain a catalyst loading of  $0.6 \text{ mg} \cdot \text{cm}^{-2}$ . The ORR measurements were performed in an  $\text{O}_2$ -saturated 0.1 M KOH electrolyte within a potential range of 0-1.1 V vs. RHE at a scan rate of  $10 \text{ mV s}^{-1}$ . The stability of the electrocatalyst was assessed using chronoamperometry at 0.5 V vs. RHE. The methanol tolerance of the catalyst was evaluated by adding 10 mL of methanol to the electrolyte. RDE measurements were conducted at different rotating speeds ranging from 625 to 2500 rpm, with a cathodic scan rate of  $5 \text{ mV s}^{-1}$ . The electrochemical impedance spectroscopy (EIS) measurements were carried out in the frequency range of 0.01 to 100 kHz and potential amplitude of 5 mV.

The electron transfer number ( $n$ ) was calculated by Koutecky-Levich equation:

$$\frac{1}{j} = \frac{1}{j_1} + \frac{1}{j_k} = \frac{1}{B\omega^{1/2}} + \frac{1}{j_k}$$

$$B = 0.62nF C_0 (D_0)^{2/3} \nu^{-1/6}$$

$$j_k = nFkC_0$$

where  $j$  is the measured current density;  $j_k$  and  $j_1$  are the kinetic and diffusion limiting current densities, respectively;  $\omega$  is the angular velocity of the rotating electrode ( $\omega = 2\pi N$ , where  $N$  is the linear rotation speed);  $F$  is the Faraday constant ( $F = 96,485 \text{ C mol}^{-1}$ );  $C_0$  is the saturated concentration of  $\text{O}_2$  in 0.1 M KOH ( $1.2 \times 10^{-3} \text{ M}$ );  $D_0$  is the diffusion coefficient of  $\text{O}_2$  in 0.1 M KOH ( $1.9 \times 10^{-5} \text{ cm}^2 \text{ s}^{-1}$ );  $\nu$  is the kinematic viscosity of the electrolyte ( $0.01 \text{ cm}^2 \text{ s}^{-1}$ ), and  $k$  is the electron transfer rate constant.

The RRDE tests were scanned cathodically at a rate of 5 mV·s<sup>-1</sup>. The H<sub>2</sub>O<sub>2</sub> yield (%) and the electron transfer number ( $n$ ) were calculated by the following equations:

$$n = \frac{4I_{disk}}{I_{disk} + \frac{I_{ring}}{N}}$$

$$(H_2O_2)\% = \frac{200 \times \frac{I_{ring}}{N}}{I_{disk} + \frac{I_{ring}}{N}}$$

where  $I_{disk}$  and  $I_{ring}$  are the disk current and ring current, respectively;  $N$  is the current collection efficiency of 0.37 for the Pt ring.

## 6. Aqueous zinc-air batteries (ZABs) tests.

The electrochemical performance of the catalysts was evaluated in a custom-built ZAB system, integrated with a multichannel potentiostat for comprehensive single-cell characterization. In a typical ZAB, a polished Zn foil served as the anode, a catalyst-loaded composite electrode served as the cathode, and a mixed solution containing 6 M KOH and 0.2 M Zn(OAc)<sub>2</sub> was utilized as the electrolyte. The active area of the Zn anode and air cathode were 4.5 cm<sup>2</sup> and 0.4 cm<sup>2</sup>, respectively. The total volume of electrolyte in the chamber was 5 mL, and the flow rate of the electrolyte was maintained at 20 mL min<sup>-1</sup>. The catalyst ink was prepared by the same method in the three-electrode system, with the catalyst loading on the composite electrode being approximately 1.2 mg cm<sup>-2</sup>.

## Results and Discussion

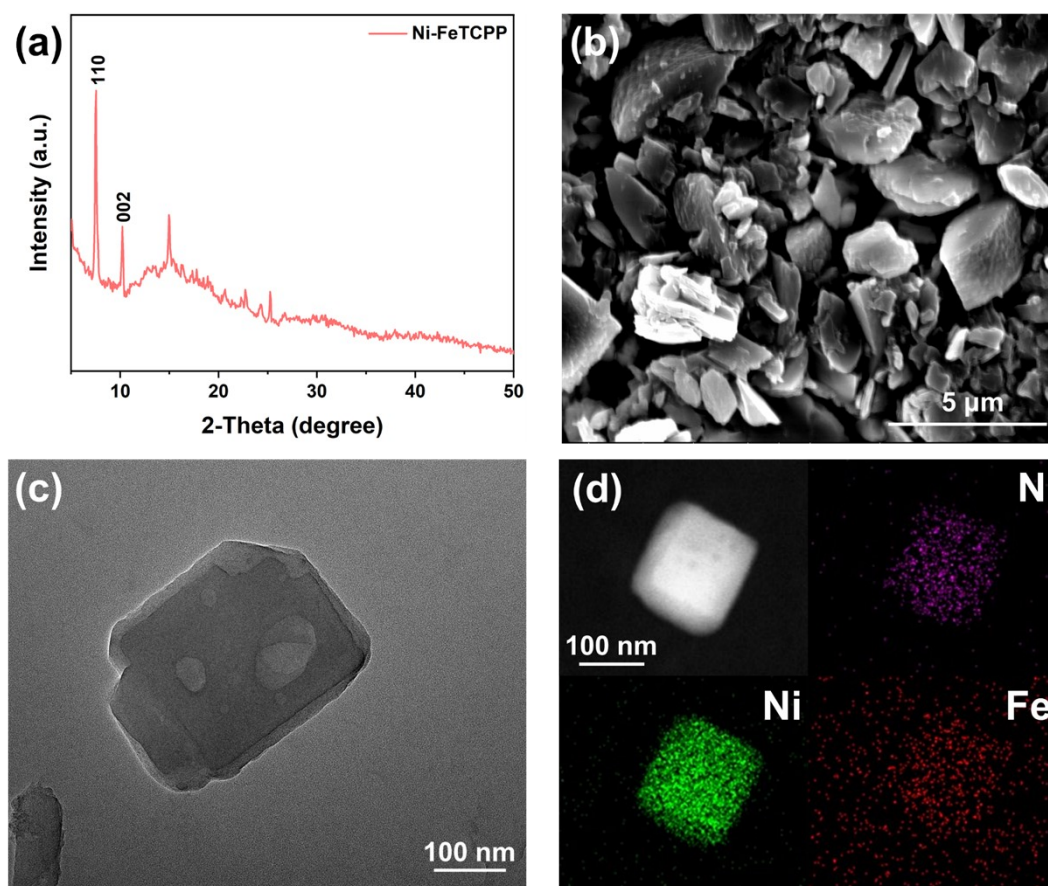

**Fig. S1** (a) PXRD pattern, (b) SEM image, (c) TEM image, and (d) corresponding EDS elemental mapping images of Ni-FeTCPP.

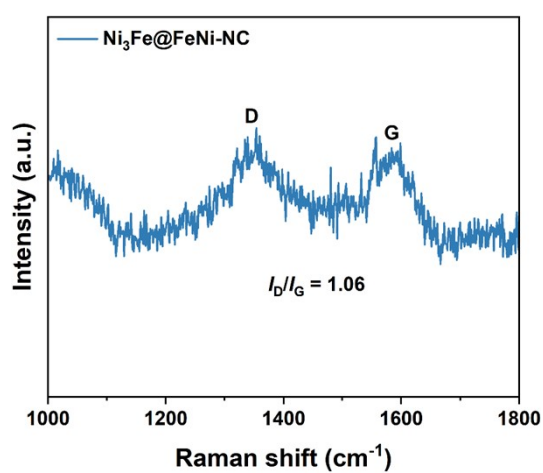

**Fig. S2** Raman spectrum of Ni<sub>3</sub>Fe@FeNi-NC.

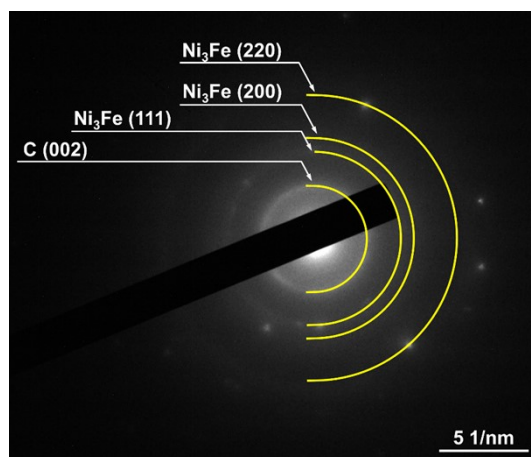

**Fig. S3** Selected area electron diffraction (SAED) pattern of  $\text{Ni}_3\text{Fe}@ \text{FeNi-NC}$ .

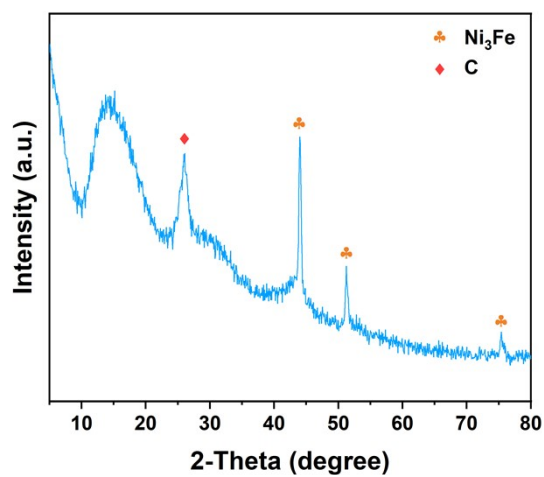

**Fig. S4** PXRD pattern of  $\text{Ni}_3\text{Fe}@ \text{FeNi-NC}$  after etching in 0.5 M  $\text{H}_2\text{SO}_4$  solution at 80 °C for 24 h.

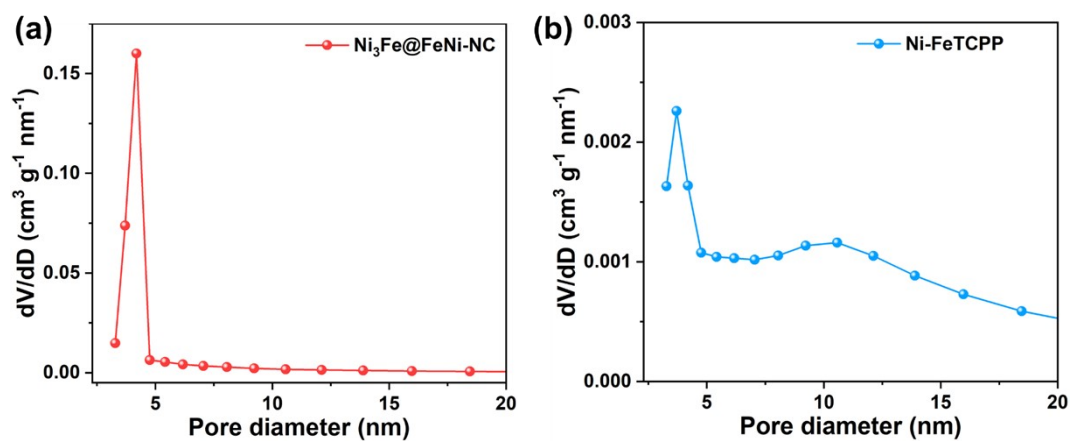

**Fig. S5** Pore size distribution curves of (a)  $\text{Ni}_3\text{Fe}@ \text{FeNi-NC}$  and (b)  $\text{Ni-FeTCPP}$ .

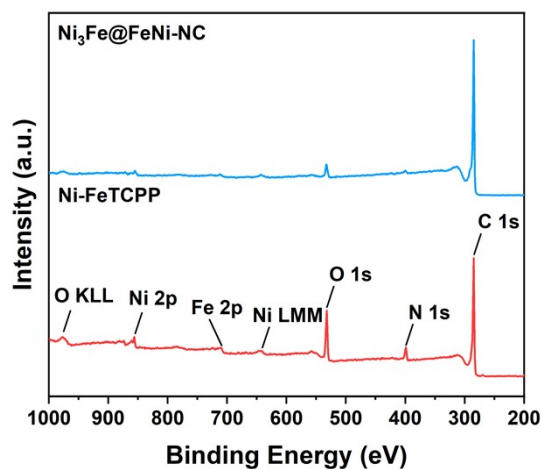

**Fig. S6** XPS survey spectra of  $\text{Ni}_3\text{Fe@FeNi-NC}$  and  $\text{Ni-FeTCPP}$ .

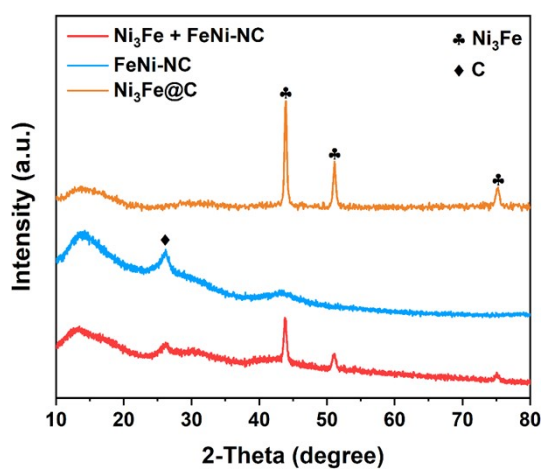

**Fig. S7** PXRD patterns of (a)  $\text{Ni}_3\text{Fe@C}$ , (b)  $\text{FeNi-NC}$ , and (c)  $\text{Ni}_3\text{Fe} + \text{FeNi-NC}$ .

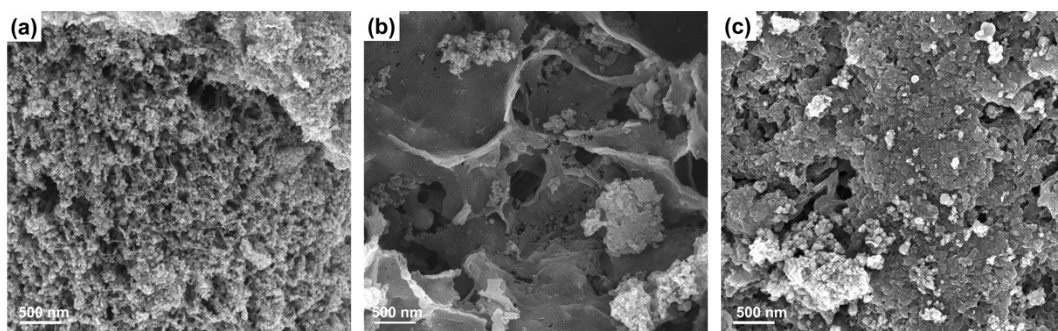

**Fig. S8** SEM images of (a)  $\text{Ni}_3\text{Fe@C}$ , (b)  $\text{FeNi-NC}$ , and (c)  $\text{Ni}_3\text{Fe} + \text{FeNi-NC}$ .



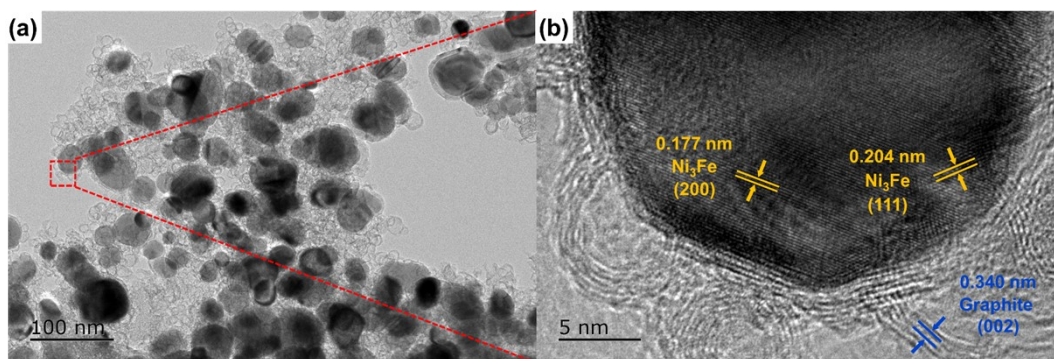

**Fig. S9** HRTEM images of  $\text{Ni}_3\text{Fe} + \text{FeNi-NC}$ .

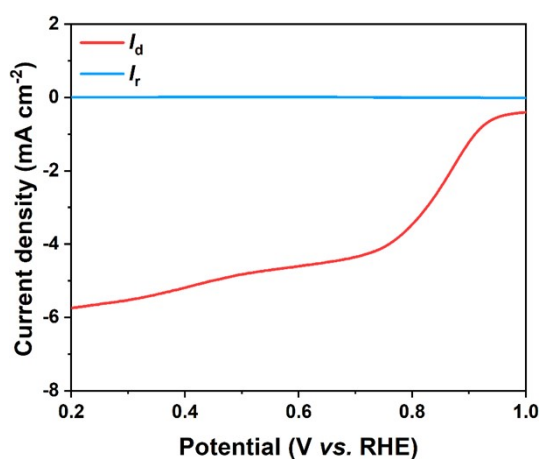

**Fig. S10** RRDE voltammograms of  $\text{Ni}_3\text{Fe@FeNi-NC}$  in 0.1 M KOH solution at 1600 rpm.

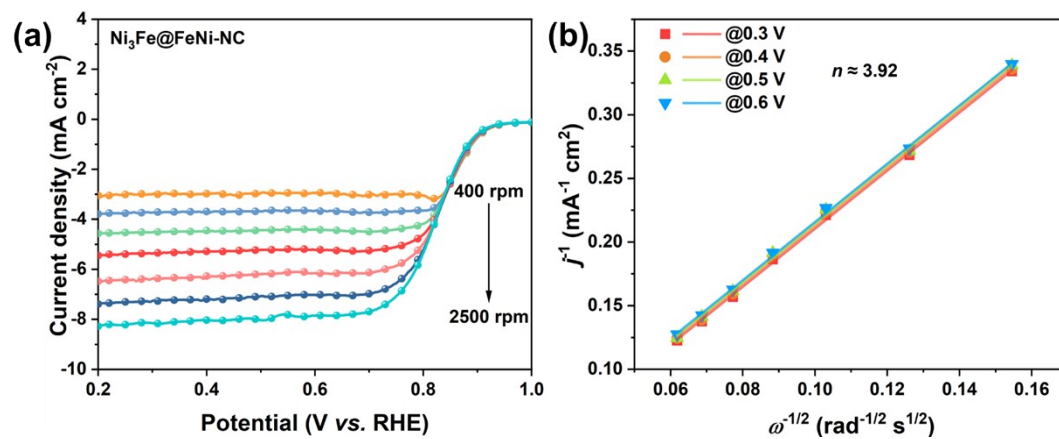

**Fig. S11** ORR polarization curves at various rotation rates and corresponding Koutecky-Levich plots for  $\text{Ni}_3\text{Fe@FeNi-NC}$ .

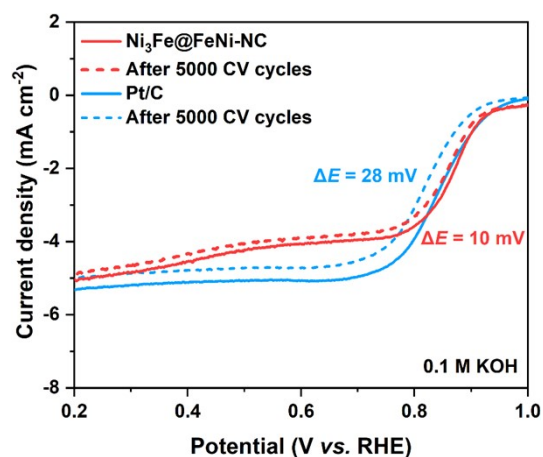

**Fig. S12** ORR polarization curves of  $\text{Ni}_3\text{Fe@FeNi-NC}$  and  $\text{Pt/C}$  after the 5,000 cycle.

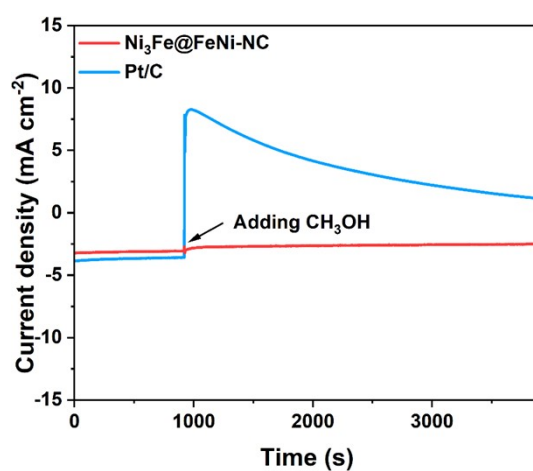

**Fig. S13** Methanol tolerance tests for  $\text{Ni}_3\text{Fe@FeNi-NC}$  and  $\text{Pt/C}$  in  $\text{O}_2$ -saturated 0.1 M KOH solution with the addition of methanol.

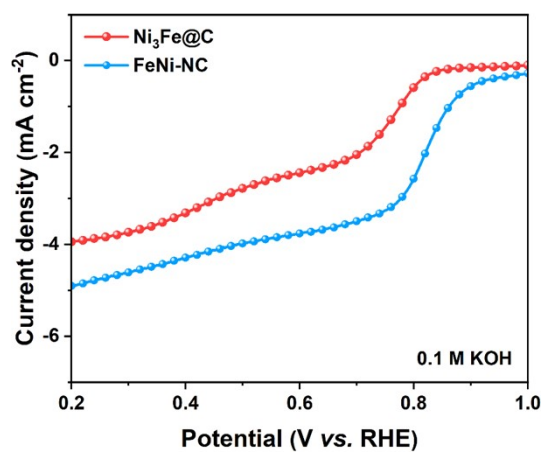

**Fig. S14** ORR polarization curves of  $\text{Ni}_3\text{Fe@C}$  and  $\text{FeNi-NC}$  in  $\text{O}_2$ -saturated 0.1 M KOH solution.

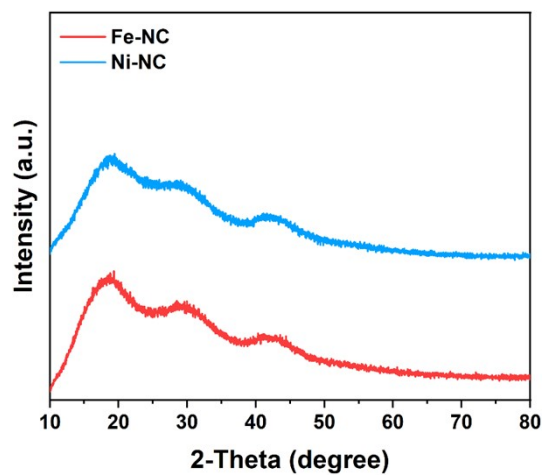

**Fig. S15** PXRD patterns of Fe-NC and Ni-NC.

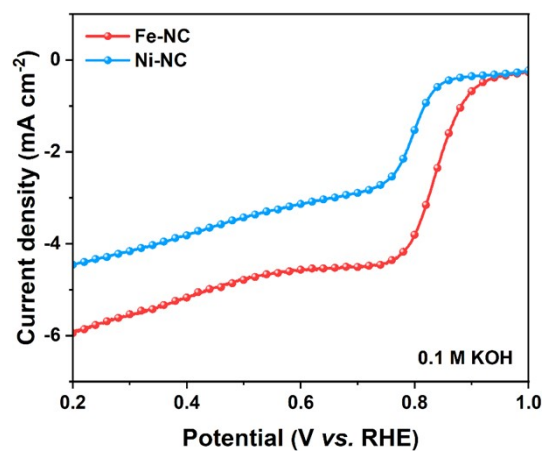

**Fig. S16** ORR polarization curves of Fe-NC and Ni-NC in O<sub>2</sub>-saturated 0.1 M KOH solution.

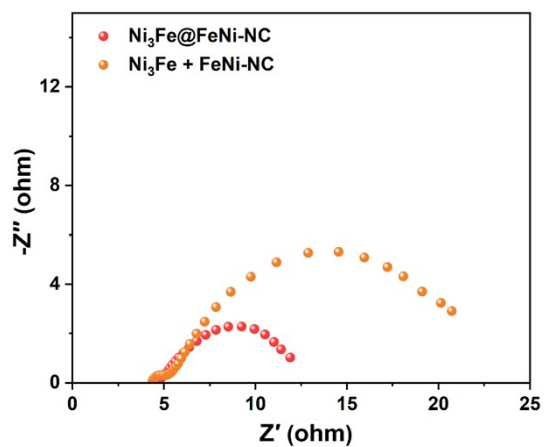

**Fig. S17** Electrochemical impedance spectra of Ni<sub>3</sub>Fe@FeNi-NC and Ni<sub>3</sub>Fe + FeNi-NC.

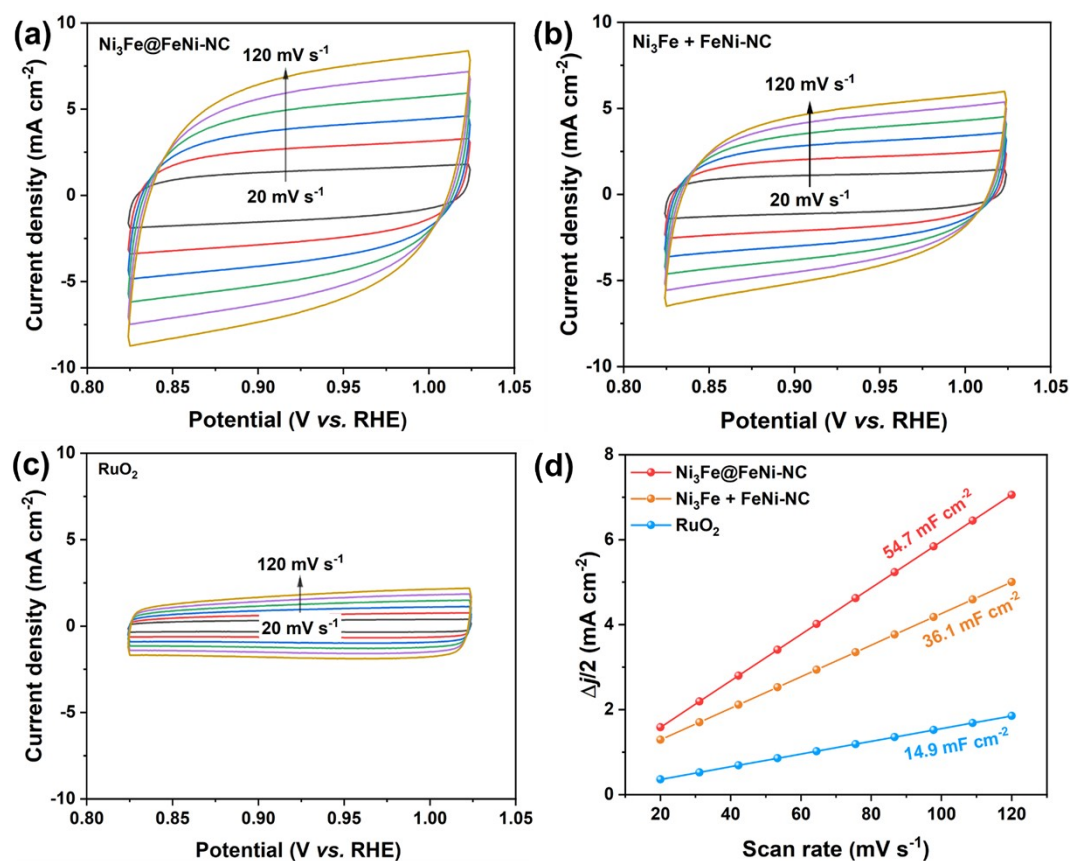

**Fig. S18** Cyclic voltammograms recorded at different scan rates for (a)  $\text{Ni}_3\text{Fe}@ \text{FeNi-NC}$ , (b)  $\text{Ni}_3\text{Fe} + \text{FeNi-NC}$ , and (c)  $\text{RuO}_2$ , respectively. (d) Corresponding fitted  $C_{dl}$  plots.

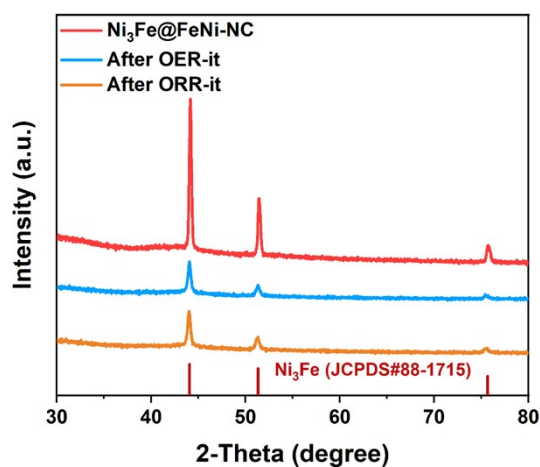

**Fig. S19** PXRD patterns of  $\text{Ni}_3\text{Fe}@ \text{FeNi-NC}$  after ORR and OER chronoamperometric tests.

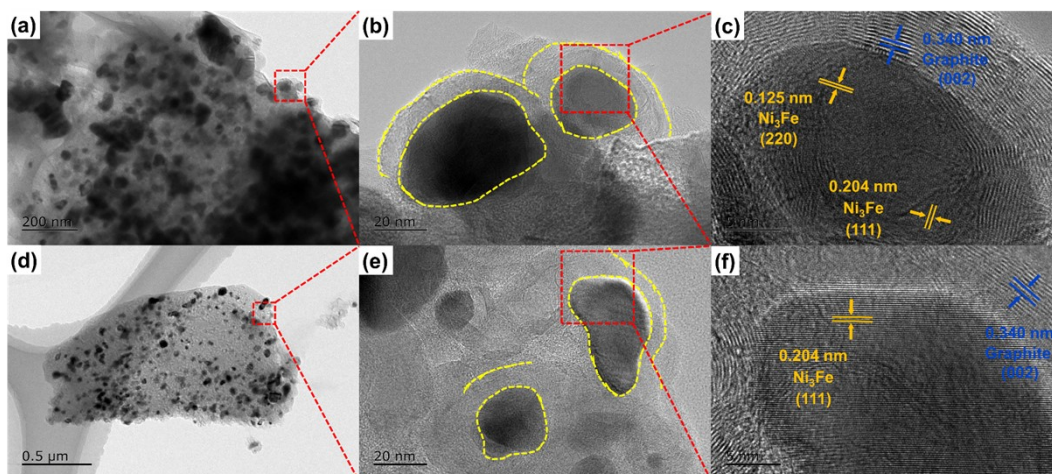

**Fig. S20** HRTEM images of  $\text{Ni}_3\text{Fe}@ \text{FeNi-NC}$  after (a-c) ORR and (d-f) OER chronoamperometric tests.

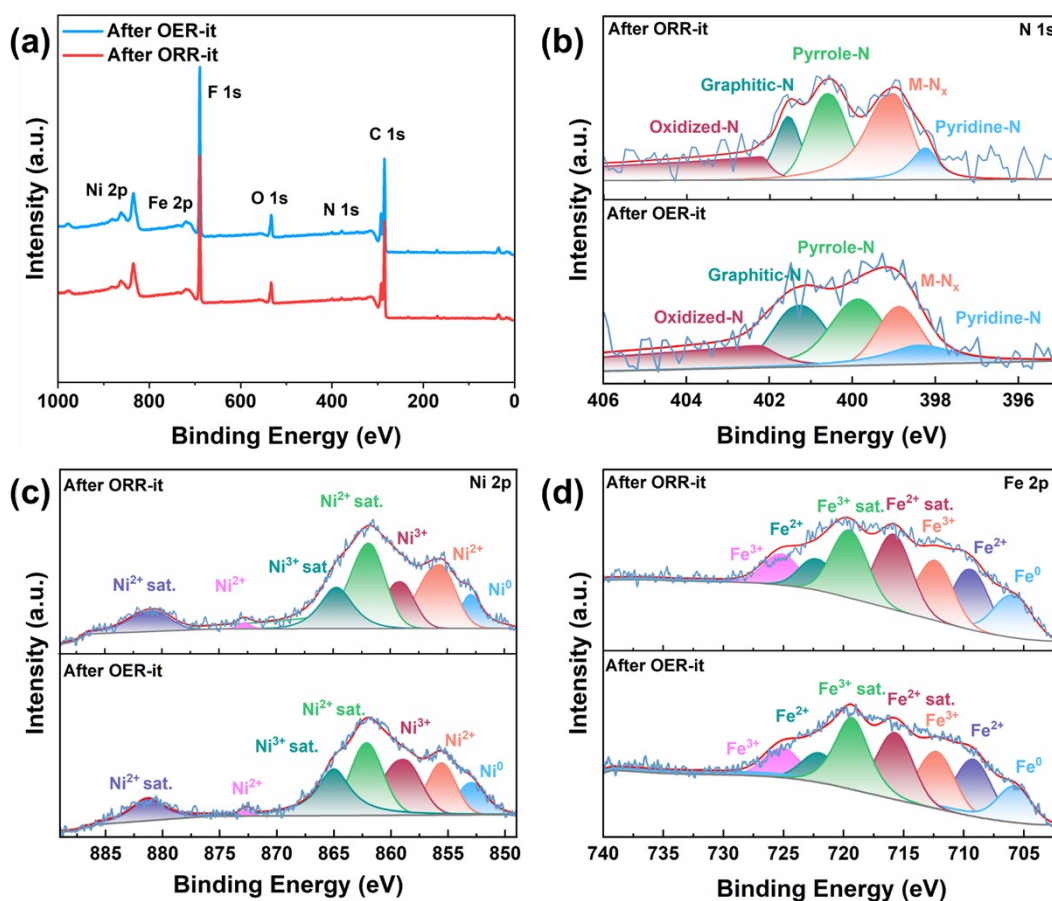

**Fig. S21** (a) Survey, (b) N 1s, (c) Ni 2p, and (d) Fe 2p high-resolution XPS spectra of  $\text{Ni}_3\text{Fe}@ \text{FeNi-NC}$  after ORR and OER chronoamperometric tests. The abnormal Ni 2p spectra resulted from the confusion with F KLL Auger electron transition of fluorine from the commonly used Nafion binder, when the XPS spectra are acquired with Al  $K\alpha$  X-ray source.<sup>[5]</sup>



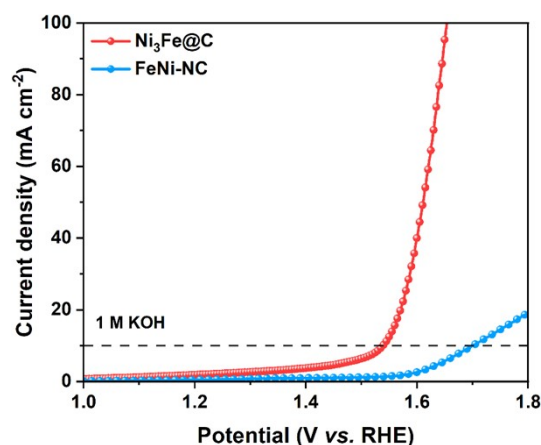

**Fig. S22** OER polarization curves of  $\text{Ni}_3\text{Fe}@C$  and  $\text{FeNi-NC}$  in  $\text{O}_2$ -saturated 1.0 M KOH solution.

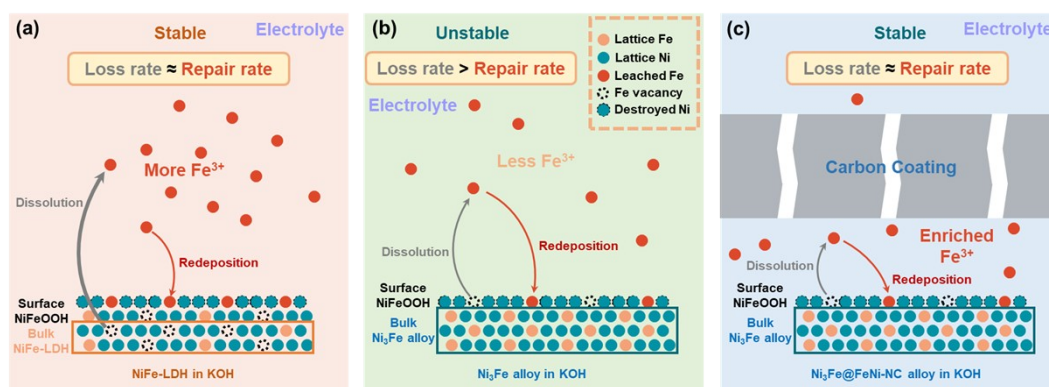

**Fig. S23** Schematic diagram of the Fe dissolution and redeposition for (a)  $\text{NiFe-LDH}$ , (b)  $\text{Ni}_3\text{Fe}$  alloy, and (c)  $\text{Ni}_3\text{Fe}@FeNi-NC$  in KOH during the OER process.<sup>[6]</sup>

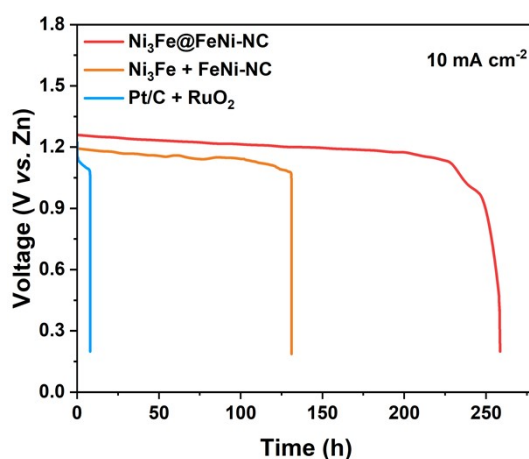

**Fig. S24** Galvanostatic discharging profiles of various catalyst-assembled zinc-air batteries at  $10 \text{ mA cm}^{-2}$ .<sup>[7]</sup> The  $\text{Ni}_3\text{Fe}@FeNi-NC$ -based ZAB delivered superior discharge capability and long-term stability.

**Table S1.** Elemental contents of C, N, Ni, and Fe in Ni-FeTCPP and Ni<sub>3</sub>Fe@FeNi-NC.

| Sample                     | Chemical composition (at%) <sup>a</sup> |      |      |      | Metal content (wt%) |     |
|----------------------------|-----------------------------------------|------|------|------|---------------------|-----|
|                            | C                                       | N    | Ni   | Fe   | Ni                  | Fe  |
| Ni-FeTCPP                  | 87.42                                   | 8.57 | 2.46 | 1.55 | -                   | -   |
| Ni <sub>3</sub> Fe@FeNi-NC | 89.88                                   | 1.8  | 3.24 | 5.08 | 21.7                | 8.6 |

<sup>a</sup> The atomic contents were collected from XPS analysis;

<sup>b</sup> The metal content was determined by the ICP-OES method.

**Table S2** Comparison of ORR and OER bifunctional catalytic activities between Ni<sub>3</sub>Fe@FeNi-NC and reported well-developed transition-metal electrocatalysts.

|                                                                 | $E_{1/2}$ (V) <sup>a</sup> | $E_{j=10}$ (V) <sup>b</sup> | $\Delta E$ (V) | Ref.                                                |
|-----------------------------------------------------------------|----------------------------|-----------------------------|----------------|-----------------------------------------------------|
| <b>Ni<sub>3</sub>Fe@FeNi-NC</b>                                 | <b>0.86</b>                | <b>1.50</b>                 | <b>0.64</b>    | <b><i>This work</i></b>                             |
| Fe/Ni-N-PCS                                                     | 0.87                       | 1.59                        | 0.72           | <i>J. Colloid Interf. Sci.</i> 2023, 633, 828-835.  |
| Fe-N@CBs                                                        | 0.91                       | 1.65                        | 0.74           | <i>Appl. Catal. B</i> 2025, 370, 125189.            |
| Fe-N <sub>x</sub> @NSCST-ZL                                     | 0.94                       | 1.71                        | 0.77           | <i>Chem. Eng. J.</i> 2023, 471, 144515.             |
| FePc-CoNC-CMS                                                   | 0.86                       | 1.54                        | 0.68           | <i>ACS Sustain. Chem. Eng.</i> 2024, 12, 4779-4788. |
| Ru <sub>SA</sub> -NiFe LDH                                      | 0.89                       | 1.46                        | 0.57           | <i>Nat. Commun.</i> 2024, 15, 9616.                 |
| Co/Co <sub>3</sub> O <sub>4</sub> @N-CNTs                       | 0.83                       | 1.50                        | 0.67           | <i>Chem. Eng. J.</i> 2022, 448, 137709.             |
| CoFeN-NCNTs//CCM                                                | 0.84                       | 1.56                        | 0.72           | <i>Adv. Funct. Mater.</i> 2022, 32, 2107608.        |
| FeCoNi@MnAl <sub>2</sub> O <sub>4</sub> -950                    | 0.79                       | 1.54                        | 0.65           | <i>J. Alloy. Compd.</i> 2024, 1004, 175802          |
| Fe/Ni-NC  FeNi@G                                                | 0.89                       | 1.50                        | 0.61           | <i>Electrochim. Acta</i> 2023, 458, 142549.         |
| Mn-RuO <sub>2</sub>                                             | 0.86                       | 1.50                        | 0.64           | <i>J. Am. Chem. Soc.</i> 2022, 144, 2694-2704.      |
| CNT@FeCo-C <sub>3</sub> N <sub>4</sub> & Ni <sub>7</sub> Fe-LDH | 0.80                       | 1.71                        | 0.91           | <i>J. Mater. Chem. A</i> 2025, 13, 19821-19830.     |
| FePc-NiCo-LDH/Ti <sub>3</sub> C <sub>2</sub>                    | 0.90                       | 1.50                        | 0.60           | <i>Appl. Surf. Sci.</i> 2022, 591, 153142.          |
| NiCo <sub>2</sub> S <sub>2</sub> @NiFeLDH/N-rGO                 | 0.81                       | 1.49                        | 0.68           | <i>Energy Environ. Sci.</i> 2025, 18, 991-1001.     |
| LDH  PCS  Pc                                                    | 0.88                       | 1.51                        | 0.63           | <i>Adv. Sci.</i> 2025, 12, e06172.                  |
| FeNC@LDH                                                        | 0.89                       | 1.46                        | 0.57           | <i>Joule</i> 2024, 8, 1-16.                         |

<sup>a</sup> Determined in O<sub>2</sub>-saturated 0.1 M KOH solution.

<sup>b</sup> Determined in O<sub>2</sub>-saturated 1.0 M KOH solution.

The  $\Delta E$  value of Ni<sub>3</sub>Fe@FeNi-NC ranks among the best reported for both single-component and multicomponent non-precious electrocatalysts.



**Table S3.** Comparison of liquid zinc-air battery performances between Ni<sub>3</sub>Fe@FeNi-NC and other reported electrocatalysts.

| Air Cathode                                                              | Peak power<br>Density<br>(mW/cm <sup>2</sup> ) | Specific capacity<br>(mAh/g)     | Cycling stability                     | Ref.                                                        |
|--------------------------------------------------------------------------|------------------------------------------------|----------------------------------|---------------------------------------|-------------------------------------------------------------|
| Ni <sub>3</sub> Fe@FeNi-NC                                               | 181                                            | 827<br>@10 mA cm <sup>-2</sup>   | 850 h<br>@10 mA cm <sup>-2</sup>      | <i>this work</i>                                            |
| MS-Co <sub>SA</sub> -N-C-800°C                                           | 160                                            | 760<br>@10 mA cm <sup>-2</sup>   | 300 cycles<br>@10 mA cm <sup>-2</sup> | <i>ACS Nano</i> 2022, 16,<br>11944-11956.                   |
| NiCo <sub>2</sub> S <sub>2</sub> @NiFeLDH/N-rGO                          | 188                                            | 732<br>@10 mA cm <sup>-2</sup>   | 668<br>@10 mA cm <sup>-2</sup>        | <i>Energy Environ. Sci.</i><br>2025, 18, 991-1001.          |
| CoSAs-NGST                                                               | 148                                            | -                                | 133 h<br>@5 mA cm <sup>-2</sup>       | <i>Adv. Funct. Mater.</i><br>2021, 31, 2010472.             |
| Fe/Ni-NC  FeNi@G                                                         | 200                                            | 876<br>@10 mA cm <sup>-2</sup>   | 500 h<br>@5 mA cm <sup>-2</sup>       | <i>Electrochim. Acta</i> 2023,<br>458, 142549.              |
| LDH  PCS  Pc                                                             | 172                                            | 816<br>@5 mA cm <sup>-2</sup>    | 300 h<br>@5 mA cm <sup>-2</sup>       | <i>Adv. Sci.</i> 2025, 12,<br>e06172.                       |
| FePc-NiCo-LDH/Ti <sub>3</sub> C <sub>2</sub>                             | 148                                            | -                                | 80 h<br>@10 mA cm <sup>-2</sup>       | <i>Appl. Surf. Sci.</i> 2022,<br>591, 153142.               |
| FeCo-N-C                                                                 | 129                                            | -                                | 120 h<br>@2 mA cm <sup>-2</sup>       | <i>Rare Met.</i> 2023, 42,<br>1526-1534.                    |
| NiOOH/P-MoS <sub>2</sub>                                                 | 125                                            | 760<br>@ 20 mA cm <sup>-2</sup>  | 300 h<br>@ 3 mA cm <sup>-2</sup>      | <i>Chem. Eng. J.</i> 2025,<br>513, 162823.                  |
| CoFeN-NCNTs//CCM                                                         | 145                                            | 778<br>@ 10 mA cm <sup>-2</sup>  | 445 h<br>@ 10 mA cm <sup>-2</sup>     | <i>Adv. Funct. Mater.</i><br>2022, 32, 2107608.             |
| Fe <sub>2</sub> O(SeO <sub>3</sub> ) <sub>2</sub> /Fe <sub>3</sub> C@N C | 341                                            | -                                | -                                     | <i>Angew. Chem. Int. Ed.</i><br>2024, 63, e202412025.       |
| CoFe-N-C                                                                 | 142.1                                          | 917.4<br>@20 mA cm <sup>-2</sup> | 200 h<br>@5 mA cm <sup>-2</sup>       | <i>Nano Lett.</i> 2022, 22,<br>3392-3399.                   |
| (NiFe-LDH) <sub>1</sub> /GA <sub>0.18</sub>                              | 230                                            | 749<br>@10 mA cm <sup>-2</sup>   | 100 h<br>@10 mA cm <sup>-2</sup>      | <i>Chem. Eng. J.</i> 2023,<br>458, 141492.                  |
| Co,S-MnSe/N-rGO                                                          | 235.2                                          | 782.7<br>@10 mA cm <sup>-2</sup> | 1833 h<br>@10 mA cm <sup>-2</sup>     | <i>Adv. Funct. Mater.</i><br>2025, 2425430.                 |
| Co/N@CNTs@CNMF-800                                                       | 133                                            | 777<br>@10 mA cm <sup>-2</sup>   | 190 h<br>@10 mA cm <sup>-2</sup>      | <i>Adv. Funct. Mater.</i><br>2020, 30, 2003407.             |
| FePc-CoNc-CMS                                                            | 147.6                                          | 631.1<br>@10 mA cm <sup>-2</sup> | 70 h<br>@10 mA cm <sup>-2</sup>       | <i>ACS Sustain. Chem. Eng.</i> 2024, 12, 4779-4788.         |
| PFePc-3                                                                  | 258.6                                          | 834<br>@50 mA cm <sup>-2</sup>   | 1300 h<br>@20 mA cm <sup>-2</sup>     | <i>Angew. Chem. Int. Ed.</i><br>2025, 64, e202501506.       |
| CoFe-FeNC                                                                | 120.8                                          | 767.5<br>@10 mA cm <sup>-2</sup> | 1200 h<br>@10 mA cm <sup>-2</sup>     | <i>Appl. Catal. B Environ. Energy</i> 2024, 359,<br>124485. |

|                                      |       |                                  |                                   |                                                 |
|--------------------------------------|-------|----------------------------------|-----------------------------------|-------------------------------------------------|
| FeOM-Mo <sub>2</sub> CT <sub>x</sub> | 155.3 | 796.3<br>@10 mA cm <sup>-2</sup> | 1500 h<br>@10 mA cm <sup>-2</sup> | <i>Adv. Funct. Mater.</i><br>2025, 35, 2422254. |
|--------------------------------------|-------|----------------------------------|-----------------------------------|-------------------------------------------------|

---

The rechargeable aqueous ZAB assembled with Ni<sub>3</sub>Fe@FeNi-NC exhibits competitive performance, however, it remains slightly inferior to the state-of-the-art systems, primarily owing to complexities associated with device assembly.

## References

- [1] D. Feng, Z.-Y. Gu, J.-R. Li, H.-L. Jiang, Z. Wei, H.-C. Zhou, *Angew. Chem. Int. Ed.* **2012**, *51*, 10307-10310.
- [2] M. Zhao, Y. Wang, Q. Ma, Y. Huang, X. Zhang, J. Ping, Z. Zhang, Q. Lu, Y. Yu, H. Xu, Y. Zhao, H. Zhang, *Adv. Mater.* **2015**, *27*, 7372-7378.
- [3] B. Liu, B. Liang, J. Xiao, M. Feng, H. Cheng, Y. Li, Y. Cheng, K. Zhang, *Compos. Part A* **2024**, *176*, 107869.
- [4] J.-N. Liu, C.-X. Zhao, J. Wang, X.-Q. Fang, C.-X. Bi, B.-Q. Li, Q. Zhang, *Joule* **2024**, *8*, 1-16.
- [5] O. Bondarchuk, A. P. LaGrow, A. Kvasha, T. Thieu, E. Ayerbe, I. Urdampilleta, *Appl. Surf. Sci.* **2021**, *535*, 147699.
- [6] Q. Zhang, W. Xiao, H. C. Fu, X. L. Li, J. L. Lei, H. Q. Luo, N. B. Li, *ACS Catal.* **2023**, *13*, 14975-14986.
- [7] J. F. Parker, J. S. Ko, D. R. Rolison, J. W. Long, *Joule* **2018**, *2*, 2519-2527.
